# Supplementary material for: Fluorescence-Based Binding Characterization of Small Molecule Ligands Targeting CUG RNA Repeats
Source: MDPI journal article supplement (doi:10.3390/ijms23063321), 2022-03-19
Supplement: s1 [file s1]

## Supporting Information

### Fluorescence-based Binding Characterization of Small Molecule Ligands Targeting CUG RNA Repeats

Zhihua Chang <sup>1</sup>, Yaying Zheng <sup>1</sup>, Johnsi Mathivanan <sup>1</sup>, Vibhav A. Valsangkar <sup>1</sup>, Jinxi Du <sup>1</sup>,  
Reham A. I. Abou-Elkhair <sup>2</sup>, Abdalla E. A. Hassan <sup>2,\*</sup> and Jia Sheng <sup>1,\*</sup>

<sup>1</sup> Department of Chemistry and The RNA Institute, University at Albany, State University of New York, 1400 Washington Avenue, Albany, NY 12222, USA; zchang@albany.edu (Z.C.); yzheng21@albany.edu (Y.Z.); jmathivanan@albany.edu (J.M.); vibhavvalsangkar@gmail.com (V.A.V.); jdu4@albany.edu (J.D.)

<sup>2</sup> Applied Nucleic Acids Research Center & Chemistry Department, Faculty of Science, Zagazig University; riham31@yahoo.com

\* Correspondence: habdallaa@aol.com (A.E.A.H.); jsheng@albany.edu (J.S.)

#### Table of Contents

|                                                                            |    |
|----------------------------------------------------------------------------|----|
| Part I. Aminoglycoside comparison data and RNA sequences                   | S2 |
| Part II. UV-melting temperature (T <sub>m</sub> ) study of RNA CUG repeats | S3 |
| Part III. Fluorescence characterization on annealed CUG RNA repeats        | S5 |
| Part IV. Fluorescence characterization on denatured CUG RNA repeats        | S7 |

#### Part I. Aminoglycoside comparison data and RNA sequences

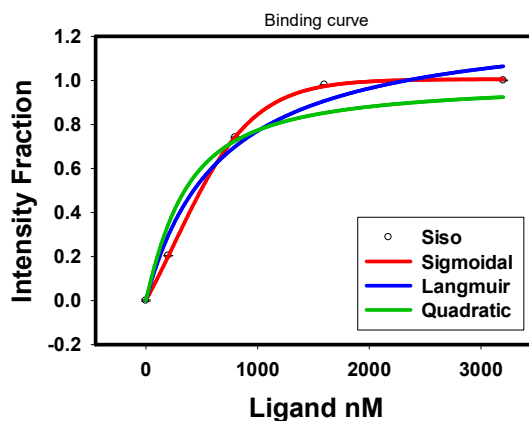

**Figure S1.** Comparison of different binding models with fluorometer data obtained at room temperature. Sigmoidal fitting (in red):  $K_d = 945$  nM,  $R^2 = 0.9999$ . Modified Langmuir isothermal model regression (in blue):  $K_d = 671$  nM,  $R^2 = 0.9766$ . Quadratic model fitting (in green):  $K_d = 247$  nM,  $R^2 = 0.9493$ .

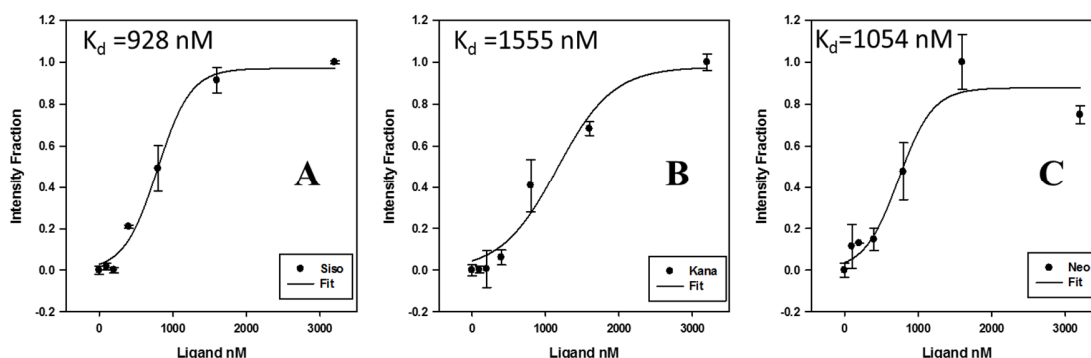

**Figure S2.** Sigmoidal fitting of aminoglycoside binding data and calculated  $K_d$  values. (A) Sisomicin:  $K_d = 928$  nM,  $R^2 = 0.9898$ ; (B) Kanamycin:  $K_d = 1555$  nM,  $R^2 = 0.9639$ ; (C) Neomycin:  $K_d = 1054$  nM,  $R^2 = 0.9471$ .

**Table S1.** CUG repeats sequences.

| Entry      | Sequence                                             |
|------------|------------------------------------------------------|
| Native r7  | 5'-CUGCUGCUGCUGCUGCUGCUG-3'                          |
| Native r10 | 5'-CUGCUGCUGCUGCUGCUGCUGCUGCUG-3'                    |
| FM1        | 5'-CUGCUGCUGCUGC <sup>red</sup> famUGCUGCUGCUGCUG-3' |

## Part II. UV-melting temperature ( $T_m$ ) study of RNA CUG repeats

Solutions of RNAs (1.5  $\mu$ M) were prepared in sodium phosphate buffer (10 mM, pH 7.0) containing 100 mM NaCl. The samples were heated to 95  $^{\circ}$ C for 5 min, then cooled down slowly to room temperature, and incubated at 4  $^{\circ}$ C for at least 2 h before  $T_m$  measurements. Thermal denaturation was performed on a Cary 300 UV-Visible Spectrophotometer utilizing a temperature controller. The block temperature was the temperature reported. Denaturing curves were acquired at 260 nm with 4 ramps by heating and cooling samples from 5 to 85  $^{\circ}$ C at a rate of 0.5  $^{\circ}$ C/min. UV melting of binding studies was conducted with RNA samples subsequently titrated by ligands generating ratios of ligand to RNA from 0 to 16. The thermodynamic parameters of samples were obtained by fitting their melting curves in the MeltWin 3.5 software.

**Table S2.** Calculated  $T_m$  for Siso-CUG binding with Meltwin 3.5.

| CUG Repeats | LM0                         | LM1                         | LM4                         | LM4_2                       | LM8                         | LM16                        |
|-------------|-----------------------------|-----------------------------|-----------------------------|-----------------------------|-----------------------------|-----------------------------|
| r7          | 59.8 $\pm$ 0.5 $^{\circ}$ C | 64.0 $\pm$ 1.3 $^{\circ}$ C | 61.9 $\pm$ 0.5 $^{\circ}$ C | 60.0 $\pm$ 0.3 $^{\circ}$ C | 62.4 $\pm$ 1.4 $^{\circ}$ C | 62.8 $\pm$ 1.0 $^{\circ}$ C |
| r10         | 57.5 $\pm$ 0.5 $^{\circ}$ C | 58.7 $\pm$ 0.5 $^{\circ}$ C | 58.8 $\pm$ 0.2 $^{\circ}$ C | 59.4 $\pm$ 0.3 $^{\circ}$ C | 60.4 $\pm$ 0.5 $^{\circ}$ C | 60.7 $\pm$ 0.5 $^{\circ}$ C |
| r10FAM      | 55.8 $\pm$ 0.6 $^{\circ}$ C | 57.4 $\pm$ 0.2 $^{\circ}$ C | 57.2 $\pm$ 0.4 $^{\circ}$ C | 57.2 $\pm$ 0.6 $^{\circ}$ C | 58.7 $\pm$ 0.5 $^{\circ}$ C | 58.6 $\pm$ 0.5 $^{\circ}$ C |

**r10FAM5 $\mu$ M**     $57.1 \pm 0.5^\circ\text{C}$      $57.3 \pm 0.7^\circ\text{C}$      $59.0 \pm 1.1^\circ\text{C}$      $59.0 \pm 0.7^\circ\text{C}$      $59.6 \pm 0.6^\circ\text{C}$      $61.2 \pm 1.0^\circ\text{C}$

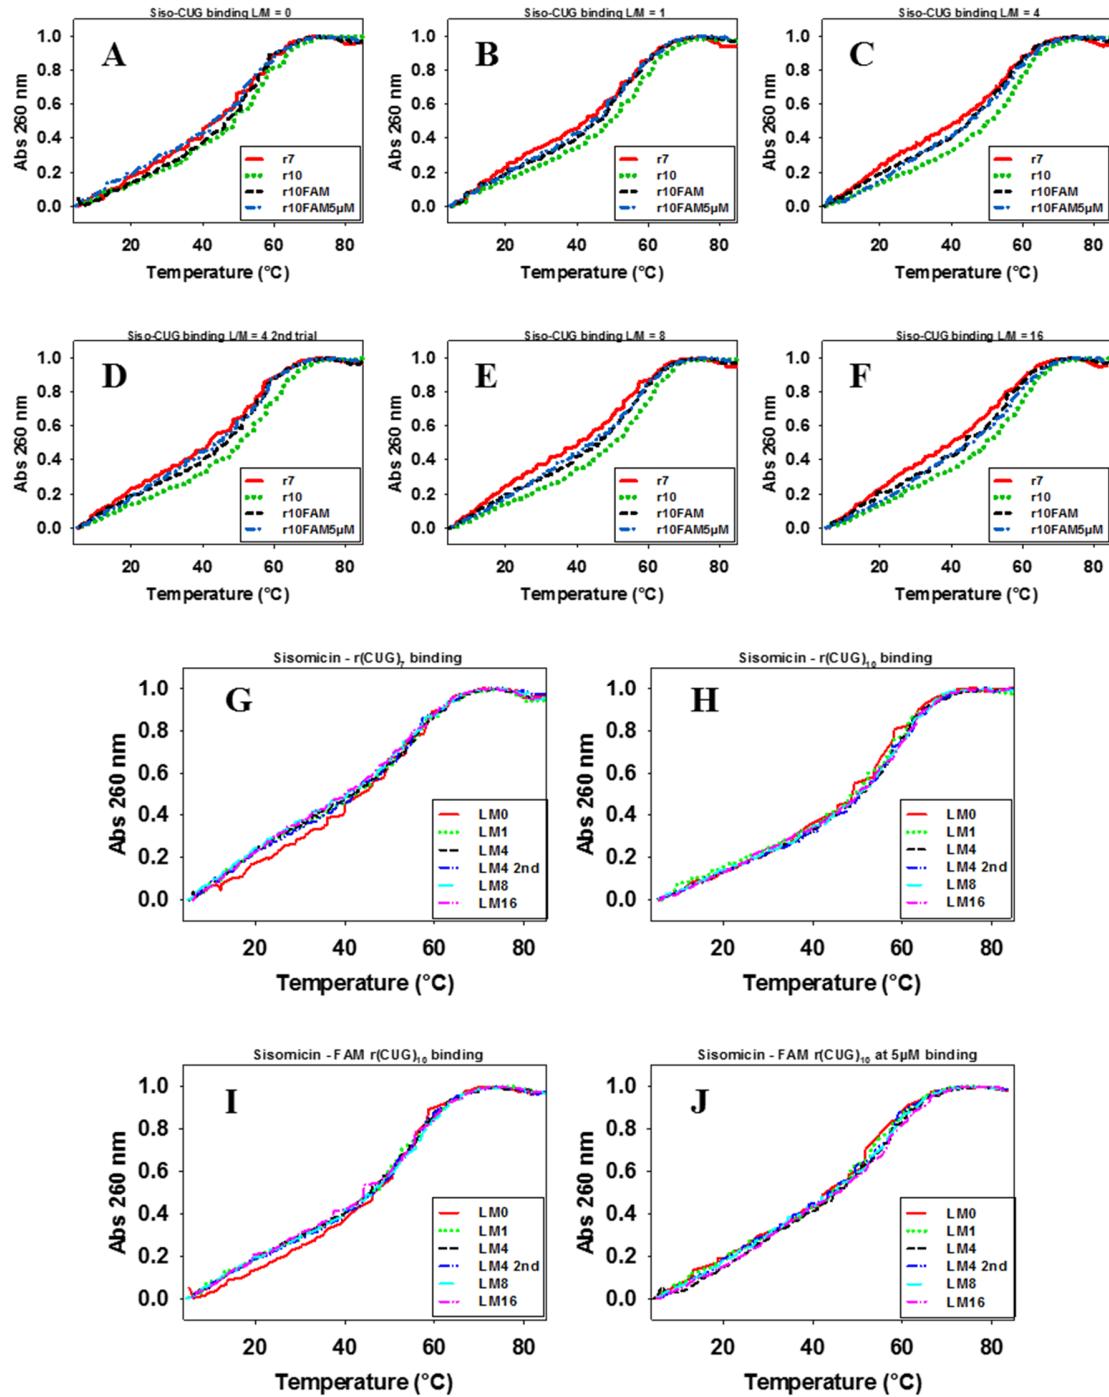

**Figure S3.** Normalized UV-melting curves of RNA-ligand complexes using sisomicin as titrant against different RNA repeat templates: r7 – native r(CUG)<sub>10</sub>, r10 – native r(CUG)<sub>10</sub>, r10FAM – FM1 r(CUG)<sub>10</sub>, all at 1.5  $\mu$ M, and r10FAM5 $\mu$ M – FM1 r(CUG)<sub>10</sub> at 5  $\mu$ M. (A – F)  $T_m$  curves at equivalent ligand/RNA molar ratios of 0, 1, 4, 4, 8, and

16 respectively; LM4 2nd: a repeat of LM4 after volume loss (~10%) compensated by adding DI water. (G – J) Ligand concentration effect on different RNA repeat templates: r7, r10, r10FAM, and r10FAM5 $\mu$ M respectively. UV-melting running conditions: 600  $\mu$ L annealed sample in sodium phosphate buffer (10 mM, pH 7.0) containing 100 mM NaCl; Absorbance recorded at 260 nm with 4 ramps in 5 – 85  $^{\circ}$ C (heating/cooling, 0.5  $^{\circ}$ C/min);  $T_m$  calculated with Meltwin 3.5 software.

### Part III. Fluorescence characterization on annealed CUG RNA repeats

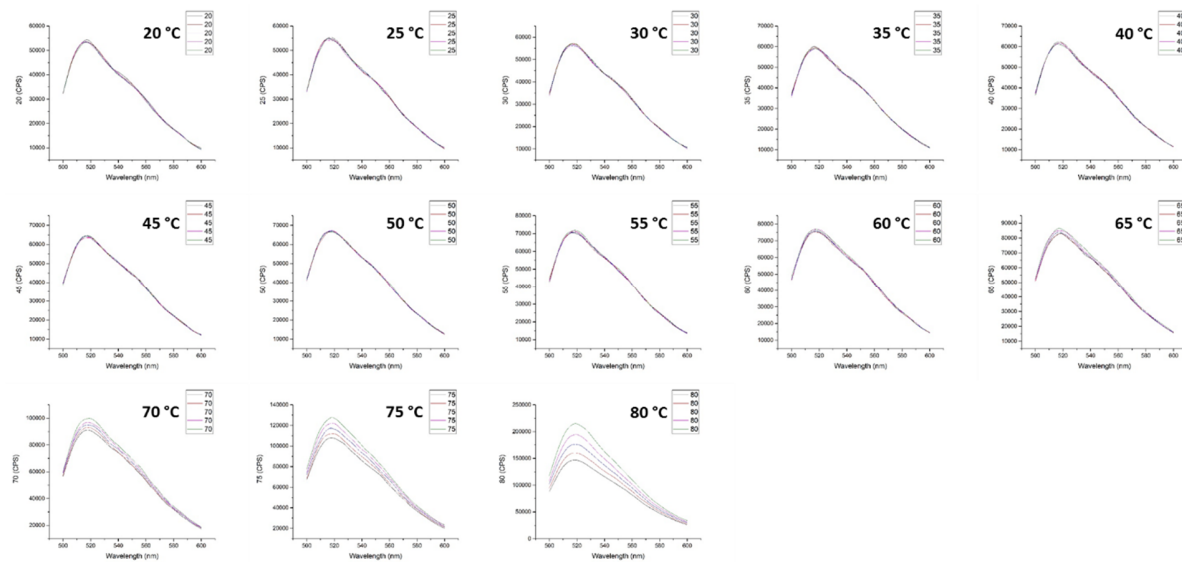

**Figure S4.** Quintuplicate spectra at each temperature of 20 – 80  $^{\circ}$ C for annealed RNA repeats. Hold time: 2 min for each scan, totally 10 min at each temperature; 150  $\mu$ L of 200 nM annealed FM1 r(CUG)<sub>10</sub> sample with no sisomicin addition; Fluorescence setting: excitation at 485 nm, emission at 500 – 600 nm, and slit width of 3 nm.

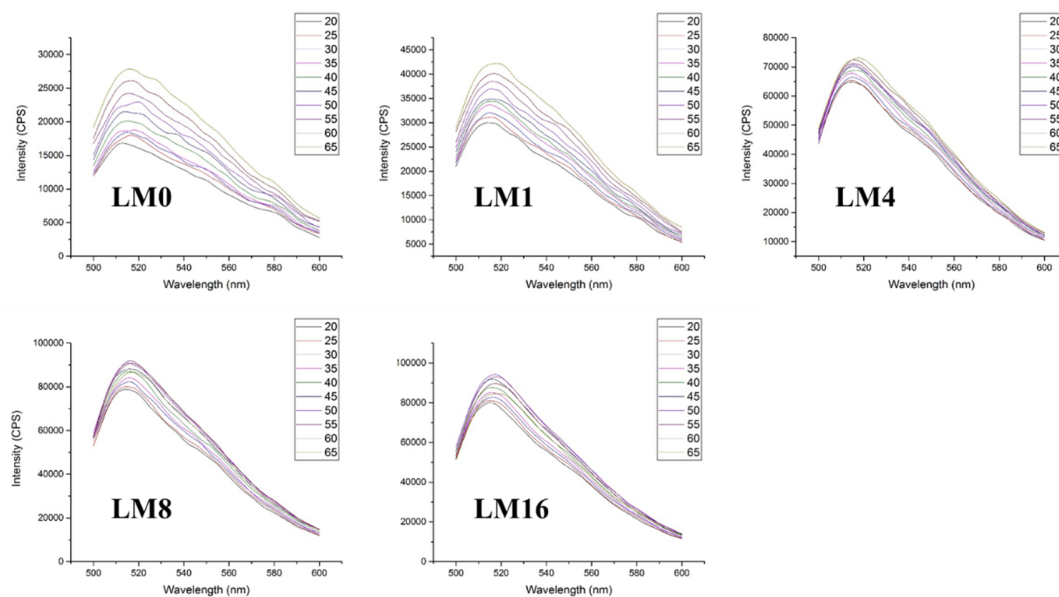

**Figure S5.** Fluorescence spectra of temperature effect on sisomicin binding towards annealed RNA repeats with different L/M. Annealed FM1 r(CUG)<sub>10</sub> RNA sample concentration 200 nM and volume size 150  $\mu$ L; Sisomicin addition volume size 1.5  $\mu$ L with ligand to RNA molar ratios – L/M at 0, 1, 4, 8, and 16; Fluorescence setting: excitation at 485 nm, emission at 500 – 600 nm, and slit width of 3 nm at 20 – 65  $^{\circ}$ C.

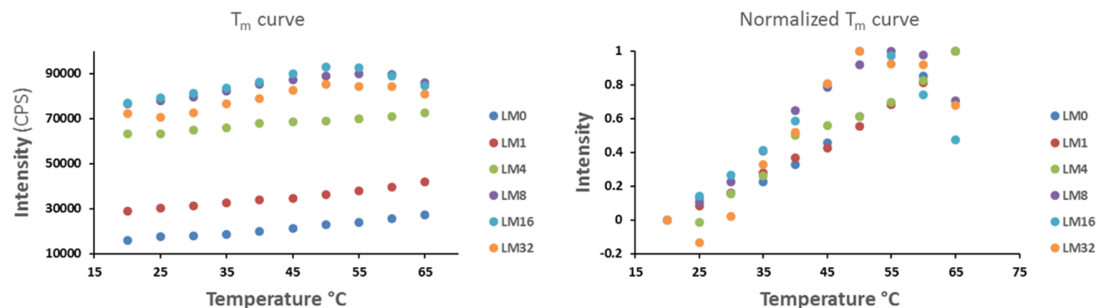

**Figure S6.**  $T_m$  curves for sisomicin binding towards annealed RNA with different L/M. Annealed FM1 r(CUG)<sub>10</sub> RNA sample concentration 200 nM and volume size 150  $\mu$ L; Sisomicin addition volume size 1.5  $\mu$ L with ligand to RNA molar ratios – L/M at 0, 1, 4, 8, and 16; Fluorescence setting: excitation at 485 nm, emission at 500 – 600 nm, and slit width of 3 nm at 20 – 65  $^{\circ}$ C.

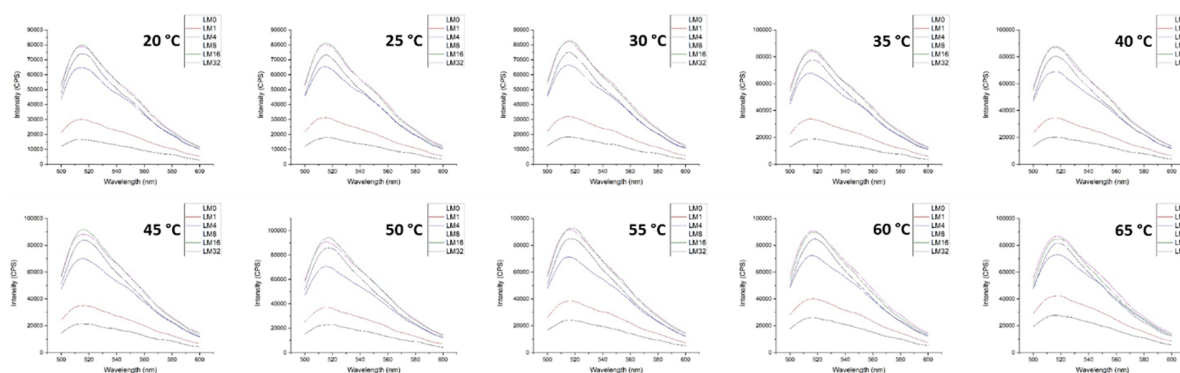

**Figure S7.** Fluorescence spectra of ligand concentration effect on sisomicin binding towards annealed RNA repeats at 20 – 65  $^{\circ}$ C. Annealed FM1 r(CUG)<sub>10</sub> RNA sample concentration 200 nM and volume size 150  $\mu$ L; Sisomicin addition volume size 1.5  $\mu$ L with ligand to RNA molar ratios of 0, 1, 4, 8, and 16; Fluorescence setting: excitation at 485 nm, emission at 500 – 600 nm, and slit width of 3 nm.

## Part IV. Fluorescence characterization on denatured CUG RNA repeats

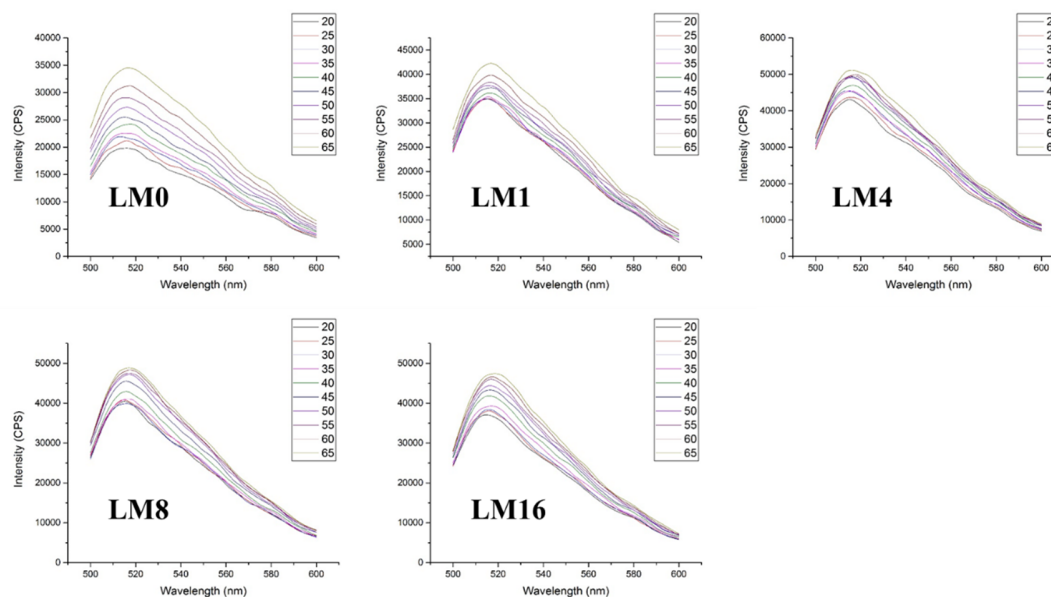

**Figure S8.** Fluorescence spectra of temperature effect on sisomicin binding towards denatured RNA repeats with different L/M. Denatured FM1 r(CUG)<sub>10</sub> RNA sample concentration 200 nM and volume size 150  $\mu$ L; Sisomicin addition volume size 1.5  $\mu$ L with ligand to RNA molar ratios – L/M at 0, 1, 4, 8, and 16; Fluorescence setting: excitation at 485 nm, emission at 500 – 600 nm, and slit width of 3 nm at 20 – 65  $^{\circ}$ C.

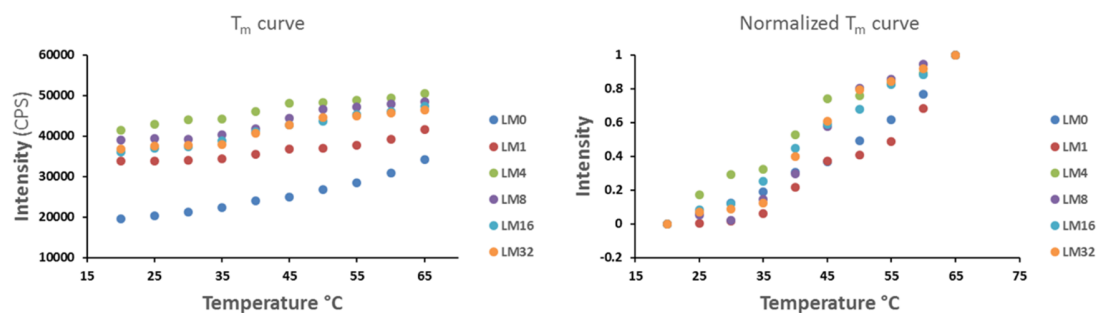

**Figure S9.**  $T_m$  curves for sisomicin binding towards denatured RNA with different L/M. Denatured FM1 r(CUG)<sub>10</sub> RNA sample concentration 200 nM and volume size 150  $\mu$ L; Sisomicin addition volume size 1.5  $\mu$ L with ligand to RNA molar ratios – L/M at 0, 1, 4, 8, and 16; Fluorescence setting: excitation at 485 nm, emission at 500 – 600 nm, and slit width of 3 nm at 20 – 65  $^{\circ}$ C.

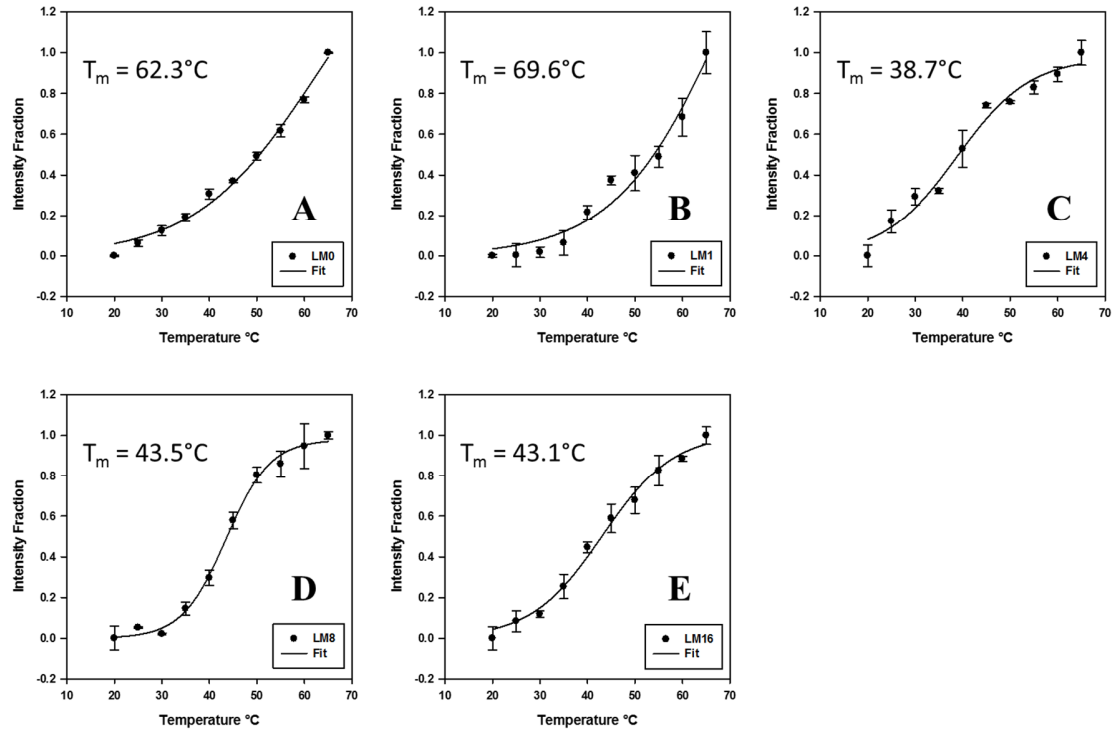

**Figure S10.** Sigmoidal fittings of  $T_m$  curves for titrating sisomicin against denatured FM1 r(CUG)<sub>10</sub>: (A – E)  $T_m$  at ligand to RNA molar ratios of 0, 1, 4, 8, and 16. Denatured FM1 r(CUG)<sub>10</sub> RNA sample concentration 200 nM and volume size 150  $\mu$ L; Ligand addition volume size 1.5  $\mu$ L; Fluorescence setting: excitation at 485 nm, emission at 500 – 600 nm, and slit width of 3 nm in a range of 20 – 65  $^{\circ}$ C.

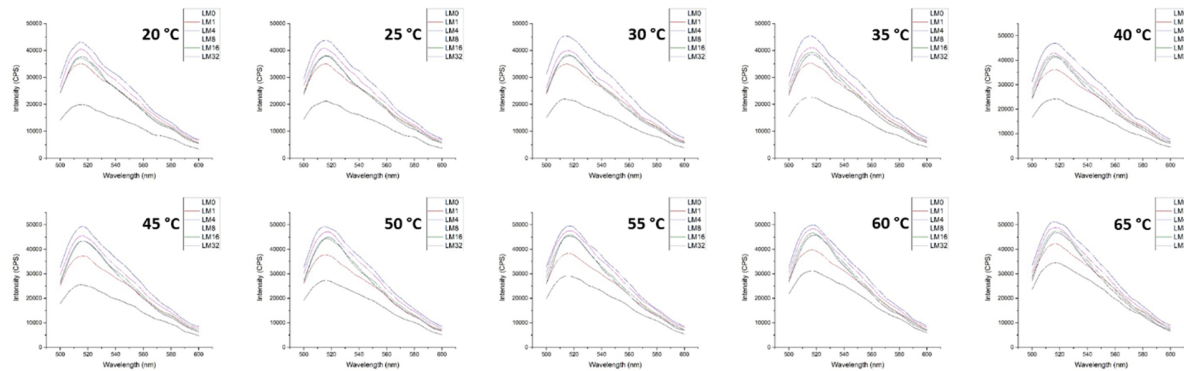

**Figure S11.** Fluorescence spectra of ligand concentration effect on sisomicin binding towards denatured RNA repeats at 20 – 65  $^{\circ}$ C. Denatured FM1 r(CUG)<sub>10</sub> RNA sample concentration 200 nM and volume size 150  $\mu$ L; Sisomicin addition volume size 1.5  $\mu$ L with ligand to RNA molar ratios of 0, 1, 4, 8, and 16; Fluorescence setting: excitation at 485 nm, emission at 500 – 600 nm, and slit width of 3 nm.

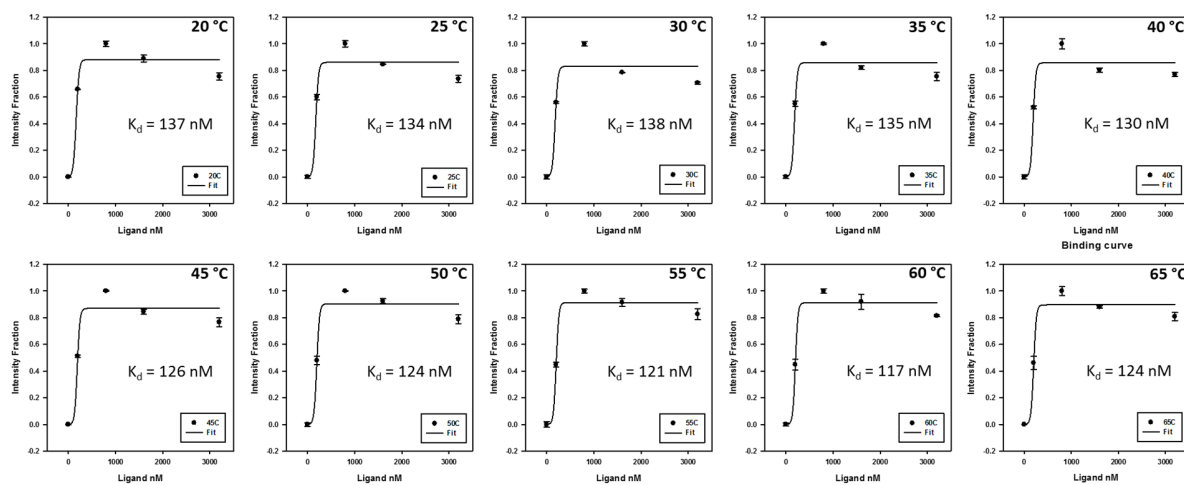

**Figure S12.** Sigmoidal data fitting of sisomicin binding towards denatured RNA repeats and calculated  $K_d$  values at 20 – 65 °C. Denatured FM1 r(CUG)<sub>10</sub> RNA sample concentration 200 nM and volume size 150  $\mu$ L; Sisomicin addition volume size 1.5  $\mu$ L with ligand to RNA molar ratios of 0, 1, 4, 8, and 16; Fluorescence setting: excitation at 485 nm, emission at 500 – 600 nm, and slit width of 3 nm.
